# Supplementary material
Source: PubMed Central journal article supplement (PMC4793607)
Supplement: tayd015623.ww1_default.pdf [file tayd015623.ww1_default.pdf]

## Appendix Study characteristics [posted as supplied by authors]

| Study        | Country                                                                                                 | Participants                                                                     | % of females | Mean (SD) age   | Agomelatine dose (mg) | Comparison     | Sample size ITT/Randomised                                                      | Follow up (weeks) | Rating scale        |
|--------------|---------------------------------------------------------------------------------------------------------|----------------------------------------------------------------------------------|--------------|-----------------|-----------------------|----------------|---------------------------------------------------------------------------------|-------------------|---------------------|
| CAGO178A2303 | USA                                                                                                     | DSM IV criteria for MDD; HAM-D $\geq$ 22                                         | 62.4         | 42.9 $\pm$ 12.5 | 25                    | Par 20mg Plb   | Ago: 162/169<br>Par: 163/168 Plb:<br>158/166                                    | 8                 | HAM-D <sub>17</sub> |
| CL3-022      | France                                                                                                  | Out or inpatients, DSM IV criteria for MDD; HAM-D $\geq$ 22                      | 69.0         | 42.4 $\pm$ 10.2 | 25                    | Flu 20mg Plb   | Ago: 129/133<br>Flu: 133/137 Plb:<br>147/149                                    | 6                 | HAM-D <sub>17</sub> |
| CL3-023      | Australia, Czech Republic, Estonia, Finland, Hungary, Latvia, Lithuania, Portugal, South Africa, Sweden | Out or inpatients, DSM IV criteria for MDD; HAM-D $\geq$ 22                      | 74.6         | 40.9 $\pm$ 10.6 | 25                    | Par 20mg Plb   | Ago: 141/142<br>Par: 137/138 Plb:<br>137/137                                    | 6                 | HAM-D <sub>17</sub> |
| CL3-024      | Argentina, Canada, Chile, Finland, France, Mexico, South Africa                                         | Out or inpatients, DSM IV criteria for MDD; HAM-D $\geq$ 22                      | 72.5         | 40.9 $\pm$ 10.9 | 25, 50                | Flu 20mg Plb   | Ago(25): 148/150<br>Ago(50): 147/151<br>Flu: 146/148 Plb:<br>158/158            | 6                 | HAM-D <sub>17</sub> |
| CL3-026      | Sweden, Finland, France, Portugal, Australia, Canada, South Africa                                      | Out or inpatients, age $\geq$ 60 years, DSM IV criteria for MDD; MADRS $\geq$ 24 | 67.0         | 67.3 $\pm$ 5.2  | 25                    | Plb            | Ago: 106/109<br>Plb: 106/109                                                    | 6                 | MADRS               |
| CL3-048      | Australia, Belgium, Denmark, France, Hungary, Italy, Norway, Poland, Portugal, Spain                    | Outpatients, age $\geq$ 60 years, DSM IV-TR criteria for MDD; HAM-D $\geq$ 22    | 73.1         | 68.5 $\pm$ 6.2  | 25 to 50              | Par 20 to 30mg | Ago: 209/213<br>Par: 194/199                                                    | 12                | HAM-D <sub>17</sub> |
| CL3-052      | China, Singapore, Malaysia, Taiwan, Korea                                                               | DSM IV-TR criteria for MDD; HAM-D $\geq$ 22                                      | 69.4         | 39.0 $\pm$ 12.7 | 25 to 50              | Flu 20 to 40mg | Ago: 301/314<br>Flu: 308/314                                                    | 8                 | HAM-D <sub>17</sub> |
| CL3-063      | Australia, Brazil, Canada, France, Russia, South Africa, UK                                             | Outpatients, DSM IV-TR criteria for MDD; HAM-D $\geq$ 22                         | 71.0         | 43.2 $\pm$ 12.4 | 25 to 50              | Esc 10 to 20mg | Ago: 162/164<br>Esc: 160/160                                                    | 12                | HAM-D <sub>17</sub> |
| CL3-069      | Argentina, Bulgaria, Finland, Russia, Slovakia, Ukraine                                                 | Outpatients, DSM IV-TR criteria for MDD; HAM-D $\geq$ 22                         | 73.0         | 45.0 $\pm$ 12.6 | 10,25, 25 to 50       | Plb            | Ago(10):132/133<br>Ago(25): 138/138<br>Ago(25 to 50):<br>136/137<br>Plb:141/141 | 6                 | HAM-D <sub>17</sub> |

|                        |                                                                     |                                                                               |      |                       |          |                 |                                                                                     |    |                     |
|------------------------|---------------------------------------------------------------------|-------------------------------------------------------------------------------|------|-----------------------|----------|-----------------|-------------------------------------------------------------------------------------|----|---------------------|
| CL3-070                | Argentina, Finland, Mexico, Portugal, Romania                       | Outpatients, age $\geq 60$ years, DSM IV-TR criteria for MDD; HAM-D $\geq 22$ | 68.0 | 71.8 $\pm$ 5.0        | 25 to 50 | Plb             | Ago: 148/151<br>Plb: 70/71                                                          | 8  | HAM-D <sub>17</sub> |
| Hale et al 2010        | Argentina, Brazil, Italy, Spain, UK                                 | Outpatients, DSM IV-TR criteria for MDD; HAM-D $\geq 25$                      | 77.7 | 42.3 $\pm$ 11.6       | 25 to 50 | Flu 20 to 40mg  | Ago: 247/252<br>Flu: 257/263                                                        | 8  | HAM-D <sub>17</sub> |
| Kasper et al 2010      | France, Germany, Austria, Spain, Italy, Poland                      | Outpatients, DSM IV-TR criteria for MDD; HAM-D $\geq 22$                      | 70.0 | 43.9 $\pm$ 10.3       | 25 to 50 | Ser 50 to 100mg | Ago: 150/154<br>Ser: 157/159                                                        | 6  | HAM-D <sub>17</sub> |
| Kennedy & Emsley 2006  | Finland, Canada, South Africa                                       | Outpatients, DSM IV criteria for MDD; HAM-D $\geq 22$                         | 58.3 | 42.5 $\pm$ 12.5       | 25 to 50 | Plb             | Ago: 106/107<br>Plb: 105/105                                                        | 6  | HAM-D <sub>17</sub> |
| Kennedy et al 2008     | Canada, France, UK                                                  | Outpatients, DSM IV-TR criteria for MDD; MADRS $\geq 20$                      | 72.0 | 40.9 $\pm$ 10.2       | 50       | Ven XR 150mg    | Ago: 137/137<br>Ven: 139/140                                                        | 12 | MADRS               |
| Lemoine et al 2007     | France, Spain                                                       | Outpatients, DSM IV criteria for MDD; HAM-D $\geq 20$                         | 71.2 | 40.1 (range 18 to 60) | 25 to 50 | Ven 75 to 150mg | Ago: 165/165<br>Ven: 167/167                                                        | 6  | HAM-D <sub>17</sub> |
| Loo et al 2002         | France, UK, Belgium                                                 | DSM IV criteria for MDD or bipolar II disorder (depressed); HAM-D $\geq 22$   | 66.5 | 42.3                  | 1, 5, 25 | Par 20mg Plb    | Ago(1): 136/141<br>Ago(5): 146/147<br>Ago(25): 135/137<br>Par: 144/147 Plb: 136/139 | 8  | HAM-D <sub>17</sub> |
| Olié & Kasper 2007     | France, Finland                                                     | Outpatients, DSM IV criteria for MDD; HAM-D $\geq 22$                         | 73.5 | 45.0 $\pm$ 11.3       | 25 to 50 | Plb             | Ago: 116/118<br>Plb: 119/120                                                        | 6  | HAM-D <sub>17</sub> |
| Quera-Salva et al 2011 | Australia, Austria, Brazil, Finland, France, Germany, Spain, Taiwan | Outpatients, DSM IV criteria for MDD; HAM-D $\geq 22$                         | 65.0 | 41.4 $\pm$ 11.5       | 25 to 50 | Esc 10 to 20mg  | Ago: 68/71 Esc: 61/67                                                               | 6  | HAM-D <sub>17</sub> |
| Stahl et al 2010       | USA                                                                 | DSM IV criteria for MDD; HAM-D $\geq 22$                                      | 65.4 | 43.3 $\pm$ 12.3       | 25, 50   | Plb             | Ago(25): 158/168<br>Ago(50): 161/169<br>Plb: 163/166                                | 8  | HAM-D <sub>17</sub> |

|                       |     |                                             |      |                 |        |     |                                                      |   |                     |
|-----------------------|-----|---------------------------------------------|------|-----------------|--------|-----|------------------------------------------------------|---|---------------------|
| Zajecka et al<br>2010 | USA | DSM IV criteria for<br>MDD; HAM-D $\geq$ 22 | 66.7 | 43.8 $\pm$ 12.2 | 25, 50 | Plb | Ago(25): 156/170<br>Ago(50): 161/168<br>Plb: 167/173 | 8 | HAM-D <sub>17</sub> |
|-----------------------|-----|---------------------------------------------|------|-----------------|--------|-----|------------------------------------------------------|---|---------------------|

Abbreviations: Ago = agomelatine; Plb = placebo; Par = paroxetine; Flu = fluoxetine; Esc = escitalopram; Ven = venlafaxine; Ser = sertraline; HAM-D = Hamilton Rating Scale for Depression = HAM-D; MADRS = Montgomery Asberg Depression Rating Scale; MDD = Major Depressive Disorder; DSM = Diagnostic and Statistical Manual of Mental Disorders; ITT = Intention to Treat.
